# Supplementary figures and images for: The Utility of Genomic and Transcriptomic Data in the Construction of Proxy Protein Sequence Databases for Unsequenced Tree Nuts
Source: MDPI journal article supplement (doi:10.3390/biology9050104), 2020-05-19

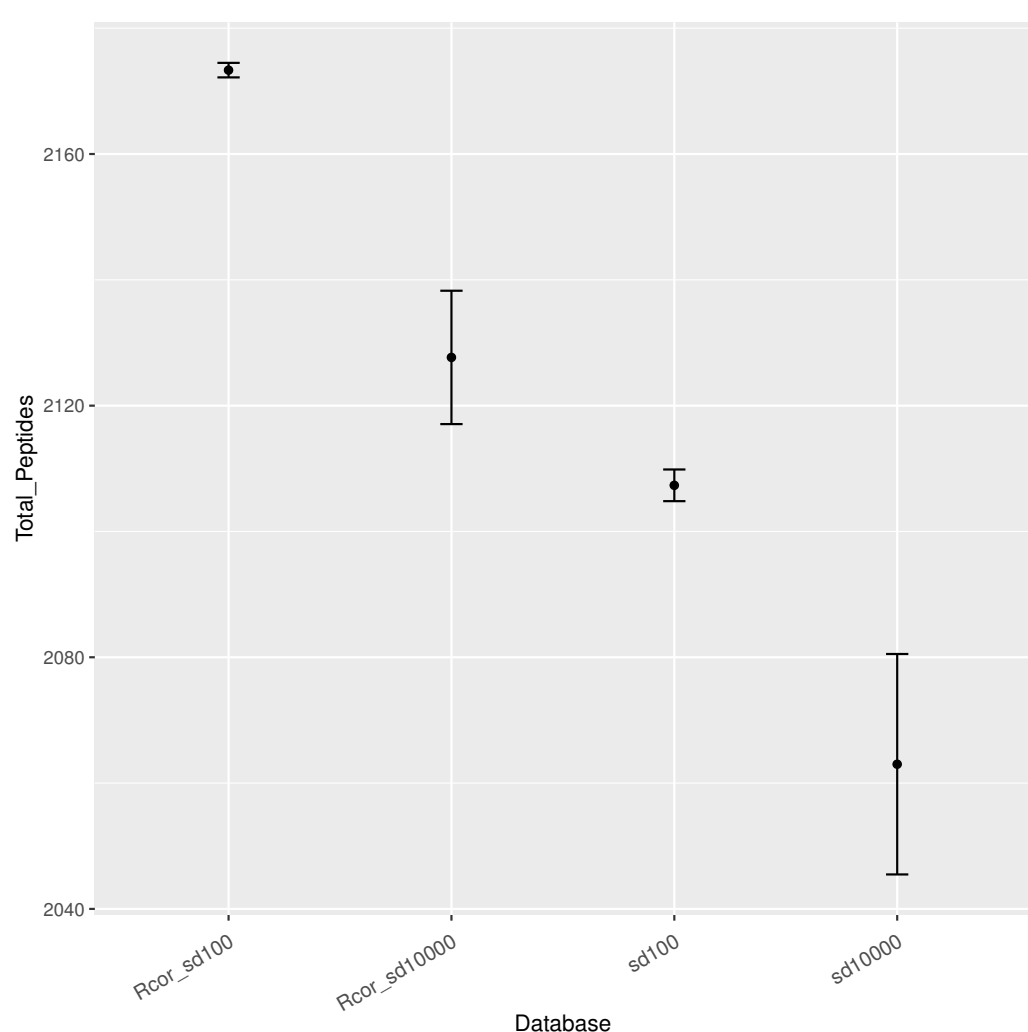

Supplement: s1 [file s1]

**A**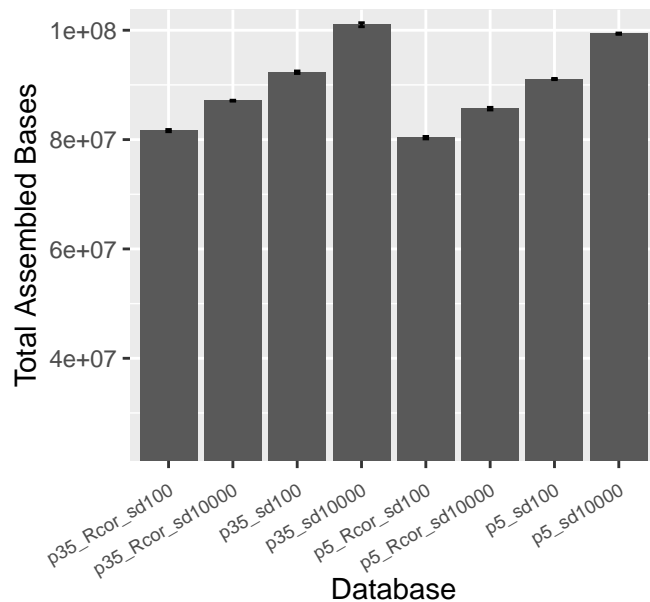**B**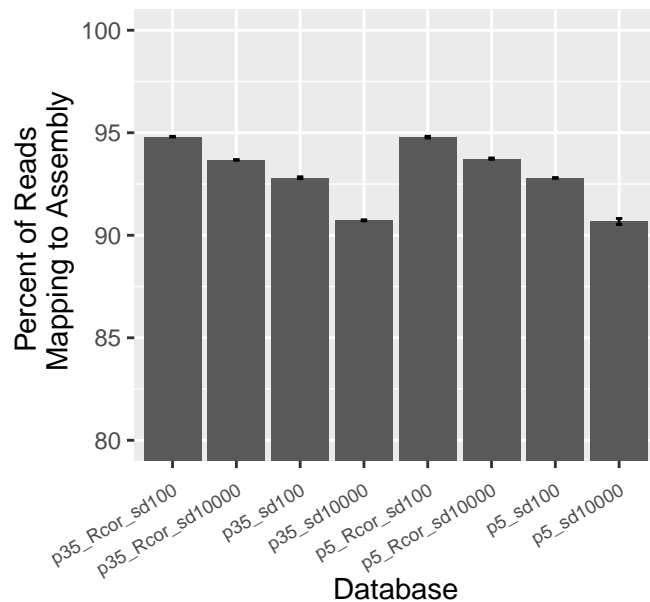**C**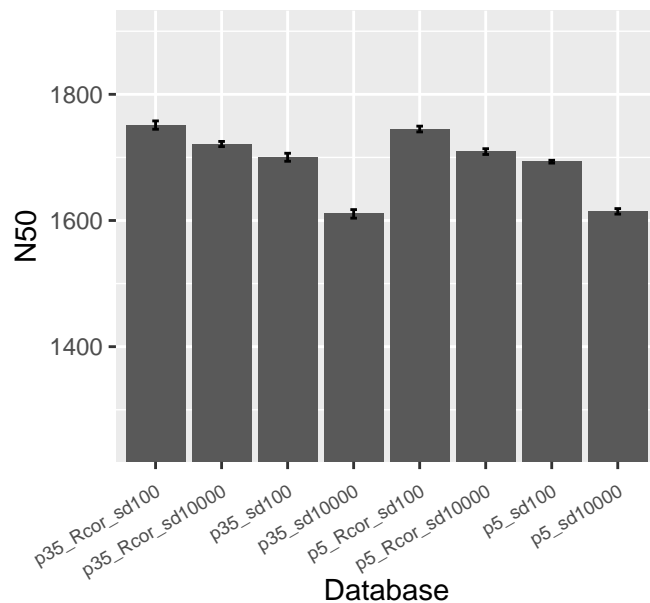**D**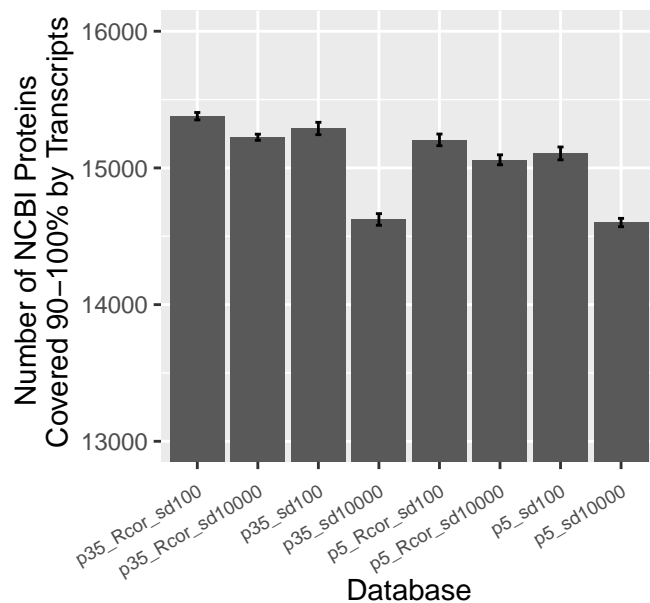

Supplement: s1 [file s1]

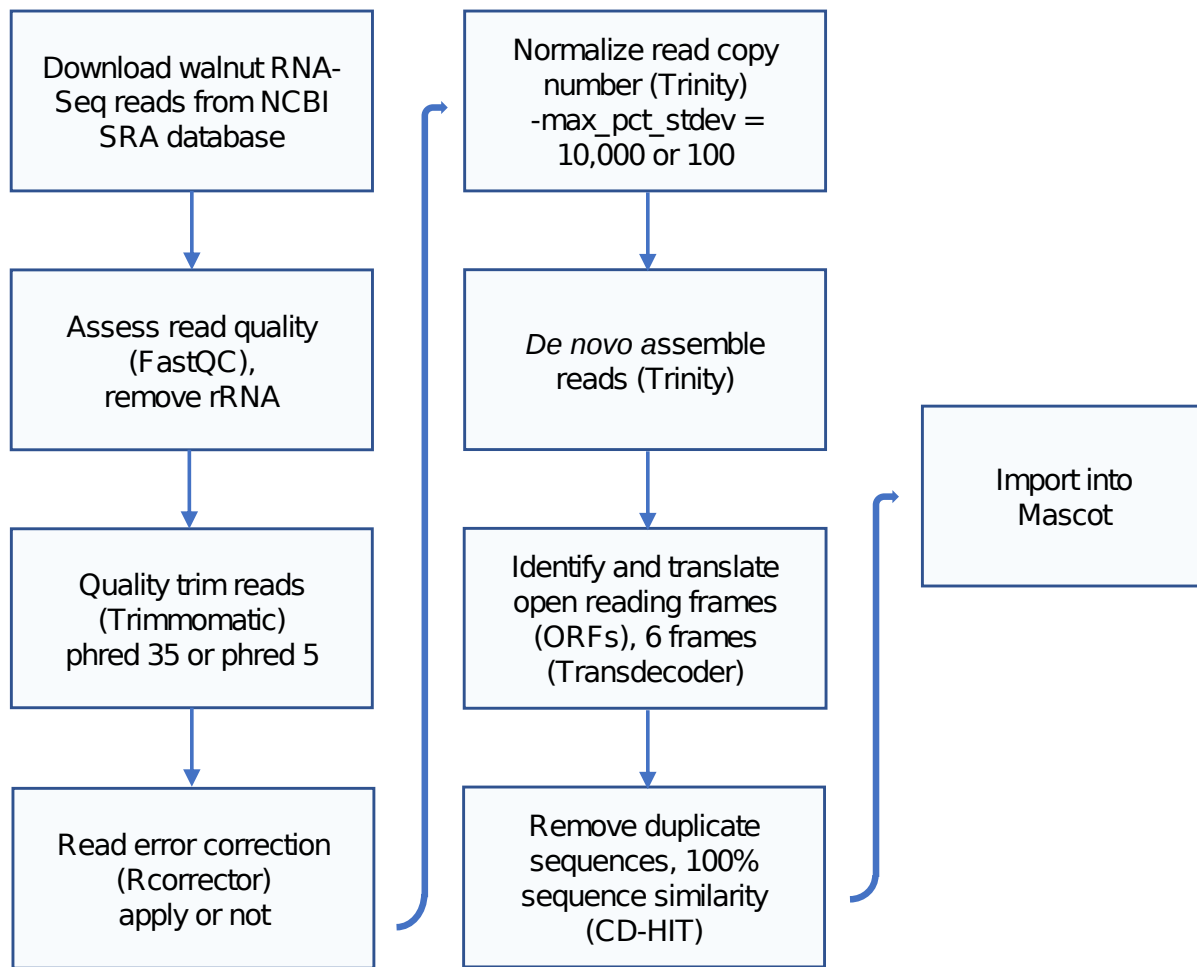

Supplement: s1 [file s1]
